# Supplementary material for: The transcription factor Rreb1 regulates epithelial architecture, invasiveness, and vasculogenesis in early mouse embryos
Source: eLife. 2021 Apr 30;10:e64811. doi: 10.7554/eLife.64811 (PMC8131102; doi:10.7554/eLife.64811)
Supplement: Figure 3—source data 1. — Differentially expressed genes were defined as those meeting fold change cutoff log2(2), adjusted p-value cutoff 0.05, and mean coverage of at least 15. [file elife-64811-fig3-data1.xlsx]

## Sheet: Sheet1
S1 Table. List of genes that are differentially expressed between wildtype and Rreb1 mutant embryos
GeneID	GeneSymbol	P.adj	log2[Rreb1Mutant/WildType]	Mean_at_cond_WildType	Mean_at_cond_Rreb1Mutant
ENSMUSG00000101249.1	Gm29216	2.02967e-21	-6.24939	78.1617	1.0274
ENSMUSG00000078139.3	AK157302	4.47479e-58	-5.94801	203.087	3.28967
ENSMUSG00000075359.2	Gm20775	1.92396e-11	-4.96639	30.2631	0
ENSMUSG00000083820.1	Gm6415	1.29181e-09	-3.66028	46.7419	3.69702
ENSMUSG00000072476.6	Gm9008	2.17599e-06	-3.55613	42.4434	3.60835
ENSMUSG00000040600.9	Eps8l3	0.000696528	-3.22327	48.8563	5.23143
ENSMUSG00000021456.7	Fbp2	3.20224e-05	-3.20713	127.124	13.7654
ENSMUSG00000022755.4	Adgrg7	0.000106986	-3.18382	46.1361	5.0771
ENSMUSG00000094649.1	Gm7102	0.0176704	-2.9468	15.8152	2.05115
ENSMUSG00000082107.1	Gm16216	5.04537e-05	-2.90288	44.5017	5.95008
ENSMUSG00000034456.15	Uroc1	2.10865e-05	-2.81823	36.4421	5.16693
ENSMUSG00000054385.14	Ceacam2	0.0473411	-2.7122	50.1483	7.65247
ENSMUSG00000054342.8	Kcnn4	0.0253736	-2.50212	20.4748	3.61415
ENSMUSG00000086503.3	Xist	7.58547e-14	-2.31829	58088.1	11646.9
ENSMUSG00000042842.10	Serpinb6b	8.94854e-07	-2.31785	310.909	62.3579
ENSMUSG00000030278.11	Cidec	3.39365e-08	-2.23365	101.741	21.6323
ENSMUSG00000024386.8	Proc	8.96348e-05	-2.08547	64.6712	15.2378
ENSMUSG00000058952.12	Cfi	0.0235888	-2.08309	104.037	24.5535
ENSMUSG00000033187.7	BC016579	0.00159697	-2.07245	46.4523	11.0443
ENSMUSG00000046352.7	Gjb2	3.66178e-07	-2.06439	496.593	118.729
ENSMUSG00000031919.5	Tmed6	0.00163865	-2.01371	38.3701	9.50176
ENSMUSG00000050097.6	Ces2b	2.78985e-08	-1.97393	214.2	54.5264
ENSMUSG00000074261.2	Erich4	0.000103479	-1.86023	147.165	40.5339
ENSMUSG00000059498.13	Fcgr3	4.86235e-06	-1.82358	155.989	44.0699
ENSMUSG00000033860.13	Fgg	1.7299e-18	-1.79217	972.369	280.759
ENSMUSG00000027513.11	Pck1	0.0116802	-1.78013	34.7176	10.1083
ENSMUSG00000068874.13	Selenbp1	0.000244772	-1.77368	60.4304	17.6736
ENSMUSG00000018924.6	Alox15	0.0334929	-1.77322	118.549	34.6822
ENSMUSG00000022479.15	Vdr	0.0108168	-1.72907	72.089	21.7455
ENSMUSG00000004038.9	Gstm3	0.000142947	-1.68584	70.2946	21.8492
ENSMUSG00000022763.16	Aifm3	1.05823e-11	-1.63827	305.119	98.017
ENSMUSG00000085715.1	Tsix	0.00343458	-1.5977	61.6395	20.3659
ENSMUSG00000034127.14	Tspan8	7.13433e-05	-1.55397	127.239	43.3338
ENSMUSG00000044770.14	Scml4	0.0102538	-1.51312	64.5196	22.6045
ENSMUSG00000024922.1	Ovol1	2.55542e-07	-1.47529	161.16	57.9629
ENSMUSG00000026295.12	Spp2	0.000108355	-1.4491	395.563	144.875
ENSMUSG00000090231.10	Cfb	0.00105593	-1.41861	75.1345	28.1058
ENSMUSG00000023057.5	Fabp2	1.71279e-05	-1.4185	123.096	46.0505
ENSMUSG00000028435.8	Aqp3	5.0273e-07	-1.37587	2042.69	787.092
ENSMUSG00000023443.13	Esx1	0.00024551	-1.34295	308.353	121.557
ENSMUSG00000070985.3	Acnat1	0.00998257	-1.32052	61.6664	24.6907
ENSMUSG00000059246.4	Foxb1	0.035986	-1.3183	456.21	182.944
ENSMUSG00000026589.14	Sec16b	0.000145957	-1.27213	119.158	49.3372
ENSMUSG00000032372.14	Plscr2	0.0185165	-1.26882	72.83	30.2243
ENSMUSG00000029644.7	Pdx1	0.00723272	-1.26406	69.5201	28.9462
ENSMUSG00000040413.15	Timd2	5.37299e-06	-1.26379	485.295	202.1
ENSMUSG00000022824.12	Muc13	8.43284e-06	-1.26063	873.119	364.407
ENSMUSG00000096546.2	Smlr1	2.12104e-06	-1.25858	194.215	81.1731
ENSMUSG00000032679.12	Cd59a	1.25475e-08	-1.22523	736.767	315.138
ENSMUSG00000032080.6	Apoa4	0.0131136	-1.22331	5202.19	2228.09
ENSMUSG00000021208.9	Ifi27l2b	0.0115363	-1.2183	85.0763	36.5649
ENSMUSG00000054932.6	Afp	2.44863e-06	-1.21744	12203.3	5248
ENSMUSG00000027463.14	Slc52a3	0.00121344	-1.20383	143.169	62.1526
ENSMUSG00000032207.9	Lipc	0.0121351	-1.17521	71.6443	31.7254
ENSMUSG00000025127.15	Gcgr	0.00326954	-1.17277	164.215	72.8409
ENSMUSG00000050424.9	Pnma5	9.63954e-05	-1.13368	875.398	398.963
ENSMUSG00000037820.15	Tgm2	2.75227e-08	-1.1299	762.422	348.386
ENSMUSG00000002799.5	Jag2	0.0339373	-1.12821	279.081	127.674
ENSMUSG00000005373.13	Mlxipl	5.1324e-06	-1.12663	308.104	141.107
ENSMUSG00000026815.14	Gfi1b	0.0253736	-1.11922	172.007	79.1818
ENSMUSG00000047797.14	Gjb1	0.000120148	-1.11566	320.102	147.721
ENSMUSG00000041849.7	Card6	0.0026221	-1.07021	117.062	55.7509
ENSMUSG00000037348.15	Paqr7	0.00653754	-1.05756	101.477	48.7539
ENSMUSG00000031304.18	Il2rg	0.00653754	-1.04646	104.385	50.5384
ENSMUSG00000028001.16	Fga	6.01274e-07	-1.02243	1014.76	499.551
ENSMUSG00000039021.15	Ttc16	0.0304095	1.00194	48.1657	96.461
ENSMUSG00000022012.8	Enox1	0.0337217	1.00616	37.3395	74.9983
ENSMUSG00000038128.6	Camk4	0.00274581	1.0081	60.8856	122.457
ENSMUSG00000078867.9	Gm14418	0.00863221	1.00858	71.7153	144.286
ENSMUSG00000074657.4	Kif5a	8.22067e-05	1.01178	301.295	607.531
ENSMUSG00000028488.15	Sh3gl2	2.87787e-07	1.02624	184.633	376.044
ENSMUSG00000025020.11	Slit1	0.0366519	1.03331	144.828	296.422
ENSMUSG00000055254.14	Ntrk2	0.00172629	1.03748	60.2361	123.643
ENSMUSG00000044303.6	Cdkn2a	0.000315348	1.03776	187.992	385.956
ENSMUSG00000039145.16	Camk1d	7.83833e-05	1.0412	95.5716	196.681
ENSMUSG00000071324.11	Armc2	0.0438339	1.05276	31.089	64.4941
ENSMUSG00000042156.15	Dzip1	8.17182e-11	1.05385	364.12	755.937
ENSMUSG00000024521.7	Pmaip1	0.0402406	1.05406	975.291	2025.06
ENSMUSG00000052560.15	Cpne8	0.00294057	1.0557	101.117	210.196
ENSMUSG00000066438.6	Plekhd1	0.0103863	1.0582	43.0535	89.6515
ENSMUSG00000048388.3	Fam171b	1.09021e-10	1.06164	336.305	701.97
ENSMUSG00000002324.7	Rec8	4.18534e-07	1.06997	178.492	374.724
ENSMUSG00000036699.12	Zcchc12	3.75018e-06	1.07198	167.134	351.368
ENSMUSG00000021591.7	Glrx	0.000124077	1.07669	909.355	1918
ENSMUSG00000028211.11	Trp53inp1	6.73927e-12	1.0794	975.684	2061.78
ENSMUSG00000038463.8	Olfml2b	0.02455	1.08113	102.372	216.588
ENSMUSG00000059434.8	Gckr	0.0240692	1.08441	33.4412	70.9126
ENSMUSG00000025964.15	Adam23	0.00162129	1.08568	247.805	525.933
ENSMUSG00000046093.9	Hpcal4	0.0370473	1.08606	29.3386	62.2838
ENSMUSG00000046844.6	Vat1l	7.39173e-07	1.08711	282.698	600.585
ENSMUSG00000013921.14	Clip3	1.62143e-12	1.08807	920.223	1956.29
ENSMUSG00000039313.14	AF529169	6.88614e-07	1.08947	204.513	435.195
ENSMUSG00000044550.11	Tceal3	0.0069419	1.08957	41.9859	89.3504
ENSMUSG00000027525.17	Phactr3	0.0015662	1.09844	50.8271	108.833
ENSMUSG00000031860.17	Pbx4	0.0334929	1.1066	29.4034	63.3167
ENSMUSG00000020000.7	Moxd1	3.29553e-07	1.10944	136.183	293.831
ENSMUSG00000019900.17	Rfx6	0.000735072	1.11375	64.1487	138.823
ENSMUSG00000030110.13	Ret	3.40873e-06	1.12459	150.809	328.823
ENSMUSG00000032549.7	Rab6b	2.79892e-13	1.12521	652.777	1423.92
ENSMUSG00000044216.6	Kcnj4	0.0201953	1.12757	42.3957	92.6303
ENSMUSG00000042429.8	Adora1	0.0106546	1.12905	337.017	737.107
ENSMUSG00000031963.7	Bmper	1.54614e-05	1.13097	289.854	634.8
ENSMUSG00000041180.13	Hectd2	7.39173e-07	1.13504	123.238	270.661
ENSMUSG00000052726.15	Kcnt2	7.39173e-07	1.13596	114.703	252.078
ENSMUSG00000030207.15	Fam234b	8.5201e-12	1.13846	305.687	672.954
ENSMUSG00000049871.13	Nlrc3	0.028607	1.13861	30.8659	67.9569
ENSMUSG00000025892.15	Gria4	1.05487e-08	1.14051	160.242	353.267
ENSMUSG00000060314.12	Zfp941	2.52503e-07	1.14137	139.399	307.5
ENSMUSG00000052776.10	Oas1a	0.0287581	1.14583	35.984	79.6233
ENSMUSG00000097767.8	Miat	1.77904e-07	1.14906	596.218	1322.23
ENSMUSG00000052125.16	F730043M19Rik	0.000749006	1.16029	55.8846	124.903
ENSMUSG00000029348.11	Asphd2	5.73645e-11	1.16154	229	512.265
ENSMUSG00000050917.4	Fgf4	0.0123966	1.1616	122.178	273.319
ENSMUSG00000011589.8	Fsd1	4.19052e-08	1.16338	271.583	608.296
ENSMUSG00000041556.8	Fbxo2	0.0052657	1.16569	49.506	111.062
ENSMUSG00000026764.15	Kif5c	6.37289e-19	1.16855	1314.39	2954.57
ENSMUSG00000073125.10	Xlr3b	0.000166564	1.17502	171.878	388.092
ENSMUSG00000048965.8	Mrgpre	0.0234413	1.17518	26.2821	59.3505
ENSMUSG00000024664.4	Fads3	0.0146527	1.17928	99.8826	226.198
ENSMUSG00000048899.8	Rimkla	0.000357424	1.18292	63.4788	144.12
ENSMUSG00000097393.7	D030068K23Rik	0.000798713	1.18826	67.7481	154.383
ENSMUSG00000028357.12	Kif12	8.70163e-11	1.18862	314.45	716.741
ENSMUSG00000035273.14	Hpse	3.041e-06	1.18944	85.426	194.827
ENSMUSG00000021696.8	Elovl7	0.00359921	1.19095	153.687	350.873
ENSMUSG00000052889.11	Prkcb	5.77204e-07	1.19871	102.688	235.705
ENSMUSG00000107008.3	Gm2762	0.0354752	1.19914	30.8273	70.7802
ENSMUSG00000021314.11	Amph	1.26811e-09	1.20791	500.415	1155.97
ENSMUSG00000032131.15	Abcg4	0.0104779	1.21655	27.9046	64.8475
ENSMUSG00000027716.13	Trpc3	0.00136798	1.22335	39.8858	93.1286
ENSMUSG00000078864.10	Gm14322	0.00853094	1.24629	32.828	77.8781
ENSMUSG00000023032.12	Slc4a8	1.7564e-13	1.24816	247.444	587.775
ENSMUSG00000028825.7	Rhd	0.00346643	1.2523	31.9956	76.22
ENSMUSG00000047155.13	Cyp4x1	0.0103863	1.25332	25.5203	60.8375
ENSMUSG00000030074.9	Gxylt2	1.03571e-08	1.26166	142.293	341.179
ENSMUSG00000029861.17	Fam131b	5.81166e-08	1.26757	374.186	900.872
ENSMUSG00000039601.15	Rcan2	2.70269e-09	1.26828	141.671	341.249
ENSMUSG00000035864.14	Syt1	0.00235849	1.27155	31.7447	76.638
ENSMUSG00000041670.15	Rims1	0.00762402	1.28221	25.8875	62.9614
ENSMUSG00000039257.11	Vstm2b	6.33003e-08	1.30667	87.4385	216.296
ENSMUSG00000060487.5	Samd5	0.0186146	1.30786	22.9564	56.8343
ENSMUSG00000021384.14	Susd3	0.00346643	1.30787	89.043	220.449
ENSMUSG00000100235.6	Gm28557	0.00853094	1.31437	24.818	61.7208
ENSMUSG00000067144.6	Slc22a7	0.0313387	1.31622	21.7857	54.2492
ENSMUSG00000055373.8	Fut9	3.12117e-10	1.32043	249.317	622.647
ENSMUSG00000020447.5	Npc1l1	6.25911e-11	1.33358	163.663	412.476
ENSMUSG00000071656.6	Lrrn4cl	0.000447651	1.33712	42.9339	108.471
ENSMUSG00000030411.15	Nova2	1.41101e-08	1.3433	86.1224	218.519
ENSMUSG00000019577.6	Pdk4	0.0075606	1.34702	23.0007	58.5105
ENSMUSG00000055978.4	Fut2	0.0150001	1.35653	18.7346	47.9734
ENSMUSG00000033207.6	Mamdc2	0.0438339	1.36019	15.6816	40.2576
ENSMUSG00000032452.12	Clstn2	4.01114e-06	1.38617	50.3271	131.547
ENSMUSG00000030406.7	Gipr	0.000596414	1.39818	29.6448	78.1345
ENSMUSG00000024670.16	Cd6	0.00212346	1.39861	31.6818	83.5286
ENSMUSG00000038156.15	Spon1	7.5294e-20	1.40237	402.919	1065.06
ENSMUSG00000039037.5	St6galnac5	0.00264727	1.40656	23.3026	61.7762
ENSMUSG00000056596.8	Trnp1	0.00477694	1.4218	21.5518	57.7415
ENSMUSG00000030707.15	Coro1a	2.7809e-06	1.42504	129.943	348.926
ENSMUSG00000050538.7	B230217C12Rik	1.25293e-11	1.42538	111.338	299.039
ENSMUSG00000031443.7	F7	0.000165994	1.42914	45.1184	121.497
ENSMUSG00000075702.9	Selm	2.20016e-05	1.43423	224.231	605.959
ENSMUSG00000024084.7	Qpct	0.0114016	1.43955	24.3597	66.0723
ENSMUSG00000062380.3	Tubb3	3.80538e-10	1.44357	625.089	1700.19
ENSMUSG00000034780.6	B3galt1	5.88476e-06	1.44716	43.2875	118.032
ENSMUSG00000021999.8	Cpb2	0.00501545	1.45322	22.2769	60.998
ENSMUSG00000063063.12	Ctnna2	1.2411e-07	1.46148	72.8244	200.552
ENSMUSG00000018698.15	Lhx1	9.50024e-06	1.46186	439.433	1210.47
ENSMUSG00000031538.5	Plat	4.01114e-06	1.46938	410.874	1137.72
ENSMUSG00000022015.8	Tnfsf11	0.0212311	1.46949	16.4188	45.4675
ENSMUSG00000062563.14	Cys1	0.00444747	1.47384	18.9089	52.5215
ENSMUSG00000029120.10	Ppp2r2c	0.0022485	1.47528	321.664	894.349
ENSMUSG00000027834.15	Serpini1	2.65836e-08	1.48106	60.8786	169.945
ENSMUSG00000025790.14	Slco3a1	8.0864e-14	1.50338	521.897	1479.61
ENSMUSG00000034591.5	Slc41a2	0.0409015	1.50646	12.5198	35.5704
ENSMUSG00000021903.11	Galnt15	0.0378346	1.51442	14.8402	42.3963
ENSMUSG00000052584.9	Serp2	3.28378e-05	1.52913	31.0179	89.5213
ENSMUSG00000005267.13	Zfp287	1.94075e-16	1.53086	143.509	414.682
ENSMUSG00000031202.5	Rab39b	2.78394e-21	1.53416	239.788	694.473
ENSMUSG00000032262.13	Elovl4	1.85117e-20	1.54133	215.466	627.14
ENSMUSG00000034457.10	Eda2r	0.000222661	1.54273	73.7458	214.855
ENSMUSG00000023484.13	Prph	0.00137415	1.54423	56.6877	165.329
ENSMUSG00000007021.4	Syngr3	3.09483e-06	1.55631	57.2634	168.412
ENSMUSG00000064225.6	Paqr9	8.62103e-08	1.56136	56.3398	166.277
ENSMUSG00000027560.4	Dok5	1.06303e-05	1.57769	31.2008	93.1316
ENSMUSG00000032224.14	Fam81a	9.03342e-09	1.58203	52.7553	157.944
ENSMUSG00000026602.9	Nphs2	0.000131278	1.5883	25.5669	76.8785
ENSMUSG00000040441.8	Slc26a10	5.73645e-11	1.59716	67.4978	204.213
ENSMUSG00000017400.10	Stac2	0.000222648	1.60269	23.9576	72.7614
ENSMUSG00000020135.13	Apc2	3.29553e-07	1.61704	59.1906	181.565
ENSMUSG00000029123.8	Stk32b	2.64482e-08	1.62549	52.9205	163.285
ENSMUSG00000018451.6	6330403K07Rik	8.2915e-17	1.65645	107.635	339.308
ENSMUSG00000024011.16	Pi16	0.00736606	1.65677	13.812	43.5506
ENSMUSG00000086596.1	Susd5	1.67104e-10	1.66572	81.7878	259.489
ENSMUSG00000058589.14	Anks1b	0.00122723	1.66652	18.9154	60.0465
ENSMUSG00000004961.7	Syt5	0.000400737	1.67219	28.7873	91.7444
ENSMUSG00000069206.13	Zfp874a	5.34163e-07	1.67389	182.716	582.998
ENSMUSG00000046613.18	Vwa5b2	1.8289e-11	1.68043	62.1932	199.344
ENSMUSG00000028970.9	Abcb1b	2.27115e-17	1.6832	257.138	825.771
ENSMUSG00000038665.15	Dgki	8.00605e-05	1.68554	54.402	174.989
ENSMUSG00000034612.7	Chst11	1.23235e-30	1.69522	330.015	1068.68
ENSMUSG00000054162.15	Spock3	0.00121344	1.70301	15.4442	50.283
ENSMUSG00000024502.9	Jakmip2	1.92053e-15	1.70371	228.499	744.306
ENSMUSG00000027794.4	Sohlh2	0.00322498	1.70597	65.7337	214.455
ENSMUSG00000021123.12	Rdh12	1.28205e-18	1.72012	122.535	403.709
ENSMUSG00000015599.8	Ttbk1	0.000510727	1.75171	94.4296	317.999
ENSMUSG00000027875.12	Hmgcs2	4.86235e-06	1.76774	78.1764	266.206
ENSMUSG00000036256.13	Igfbp7	0.0166896	1.77126	9.06779	30.9532
ENSMUSG00000071658.4	Gng3	5.8731e-13	1.78698	388.931	1342.17
ENSMUSG00000010086.17	Rnf112	0.0190476	1.79014	10.1813	35.212
ENSMUSG00000015484.3	Fam163a	8.41183e-08	1.80036	46.6821	162.597
ENSMUSG00000040584.8	Abcb1a	7.45573e-05	1.80159	18.2179	63.5082
ENSMUSG00000053030.11	Spink2	0.000173	1.80373	16.1308	56.3162
ENSMUSG00000025197.8	Cyp2c44	0.00748493	1.8122	13.6799	48.0407
ENSMUSG00000057766.13	Ankrd29	0.00210342	1.81311	24.1243	84.7724
ENSMUSG00000007783.9	Cpt1c	5.44486e-26	1.83391	230.002	819.962
ENSMUSG00000075224.8	Lrrc55	7.11049e-20	1.8351	92.7691	330.998
ENSMUSG00000032839.13	Trpc1	8.72501e-19	1.8422	85.5421	306.716
ENSMUSG00000096606.2	Gm4980	0.0257901	1.85733	9.41142	34.101
ENSMUSG00000060240.12	Cend1	8.2915e-17	1.86148	106.668	387.61
ENSMUSG00000044816.10	D630023F18Rik	0.000166564	1.86863	14.4792	52.876
ENSMUSG00000033491.13	Prss35	0.00294057	1.87003	39.7944	145.464
ENSMUSG00000026621.13	2020-03-01	4.86981e-08	1.87166	42.1686	154.317
ENSMUSG00000034958.11	Atcay	1.33991e-11	1.92826	37.8321	143.987
ENSMUSG00000068923.14	Syt11	1.23743e-17	1.94105	614.817	2360.81
ENSMUSG00000064036.15	Mro	0.000256348	1.94766	12.3215	47.5302
ENSMUSG00000055407.13	Map6	3.42394e-39	1.97015	239.714	939.219
ENSMUSG00000039838.11	Slc45a1	1.05905e-07	1.97045	76.0303	297.955
ENSMUSG00000037492.15	Zmat4	6.64064e-21	1.97412	76.0088	298.629
ENSMUSG00000058665.8	En1	9.45501e-05	2.01025	28.9577	116.657
ENSMUSG00000000673.8	Haao	0.0111062	2.02364	44.6698	181.631
ENSMUSG00000086905.1	Gm13716	1.32663e-08	2.03802	22.3223	91.6737
ENSMUSG00000065701.1	Rny1	0.0179445	2.05556	7.31995	30.4294
ENSMUSG00000026188.11	Tmem169	3.91783e-13	2.06446	35.3423	147.829
ENSMUSG00000033355.5	Rtp4	0.0388555	2.06757	5.76058	24.1471
ENSMUSG00000019894.13	Slc6a15	4.20013e-12	2.14171	91.5149	403.842
ENSMUSG00000056222.14	Spock1	0.0015662	2.17463	29.3332	132.431
ENSMUSG00000032735.14	Ablim3	1.84677e-21	2.17648	54.6922	247.235
ENSMUSG00000028024.14	Enpep	2.43479e-44	2.18177	248.259	1126.38
ENSMUSG00000045509.5	Gpr150	0.0499562	2.23605	3.68377	17.3544
ENSMUSG00000036067.12	Slc2a6	5.76747e-07	2.25292	12.8946	61.4618
ENSMUSG00000060212.13	Pcnxl2	1.64531e-09	2.3303	55.8718	280.985
ENSMUSG00000083695.6	Rnf138rt1	0.012447	2.33683	4.25228	21.4821
ENSMUSG00000027015.4	Cybrd1	1.52347e-20	2.36133	40.3956	207.57
ENSMUSG00000035964.7	Tmem59l	9.57532e-28	2.36249	207.321	1066.16
ENSMUSG00000002190.13	Clgn	1.304e-15	2.37955	38.0817	198.168
ENSMUSG00000048108.13	Tmem72	0.0243967	2.41635	3.64498	19.4575
ENSMUSG00000047638.15	Nr1h4	3.1469e-07	2.44379	10.2802	55.9316
ENSMUSG00000045034.12	Ankrd34b	0.00236138	2.55119	4.06992	23.8544
ENSMUSG00000064945.1	Rny3	0.0334929	2.69037	5.25414	33.9144
ENSMUSG00000098123.1	Gm4518	7.36966e-08	2.82681	8.7152	61.8345
ENSMUSG00000041141.7	Pnmal1	5.92174e-12	2.85461	14.2904	103.363
ENSMUSG00000034855.13	Cxcl10	1.87485e-12	2.91466	10.9772	82.7742
ENSMUSG00000019124.10	Scrn1	4.47135e-27	2.96729	38.6625	302.366
ENSMUSG00000024029.4	Tff3	3.52405e-06	3.02988	5.21266	42.574
ENSMUSG00000036131.12	Frmd7	5.62941e-43	3.19319	36.5346	334.157
ENSMUSG00000039057.9	Myo16	1.5256e-21	3.66889	7.85811	99.9454
ENSMUSG00000034690.12	Nlrp4c	5.28e-06	3.73156	11.3202	150.372
ENSMUSG00000022044.14	Stmn4	3.14813e-15	3.81088	5.20923	73.1074
ENSMUSG00000033633.13	Clec18a	1.62136e-20	4.25706	4.06163	77.6609
ENSMUSG00000002930.6	Ppp1r17	5.18548e-08	4.98257	6.29193	198.924
ENSMUSG00000099876.1	Gm29650	7.9175e-17	5.33257	0	39.2961
ENSMUSG00000089640.1	Gm6397	8.00605e-05	5.46752	2.68535	118.82
ENSMUSG00000068457.14	Uty	1.41921e-243	10.6276	0.574905	909.519
ENSMUSG00000056673.14	Kdm5d	4.18218e-278	11.5034	0.38302	1111.92
ENSMUSG00000069049.11	Eif2s3y	0	13.1324	0.190956	1714.68
ENSMUSG00000069045.11	Ddx3y	0	13.5923	0.190956	2358.36
