# Supplementary material for: The transcription factor Rreb1 regulates epithelial architecture, invasiveness, and vasculogenesis in early mouse embryos
Source: eLife. 2021 Apr 30;10:e64811. doi: 10.7554/eLife.64811 (PMC8131102; doi:10.7554/eLife.64811)
Supplement: Figure 3—source data 2. — Gene ontology analyses were performed using the Database for Annotation, Visualization, and Integrated Discovery (DAVID) Bioinformatics resource gene ontology functional annotation tool with all NCBI Mus musculus genes as a reference list. [file elife-64811-fig3-data2.xlsx]

## Sheet: Sheet1
Table S2. Gene Ontology (GO) analysis of genes significantly upregulated and downregulated in E7.5 Rreb1 mutant embryos.
Upregulated genes
Category	Term	Count	%	PValue	Genes	List Total	Pop Hits	Pop Total	Fold Enrichment	Bonferroni	Benjamini	FDR
GOTERM_CC_DIRECT	GO:0045202~synapse	15	7.73196	0.000188229	PLAT, CPT1C, SYT1, ANKS1B, SYT5, SYT11, GRIA4, DGKI, ADORA1, RIMS1, SYNGR3, AMPH, KCNJ4, ATCAY, SH3GL2	177	505	19662	3.29955	0.0338625	0.0338625	0.232242
GOTERM_CC_DIRECT	GO:0014069~postsynaptic density	10	5.15464	0.000312524	ANKS1B, CLSTN2, SYT11, NTRK2, GRIA4, GNG3, DGKI, RIMS1, ADORA1, CTNNA2	177	239	19662	4.6479	0.0555956	0.0281953	0.385329
GOTERM_CC_DIRECT	GO:0030424~axon	12	6.18557	0.000520434	CPT1C, SYT1, PRPH, ATCAY, RET, CORO1A, KIF5A, SYT11, NTRK2, STMN4, TUBB3, CTNNA2	177	370	19662	3.60275	0.0908674	0.0312559	0.640918
GOTERM_CC_DIRECT	GO:0016020~membrane	85	43.8144	0.000591859	PRPH, SYT1, CLSTN2, SYT5, SLC45A1, ENPEP, SLC26A10, ADORA1, ST6GALNAC5, FAM171B, HPSE, ELOVL4, CHST11, GXYLT2, NPC1L1, RAB6B, ELOVL7, LRRC55, GNG3, CYS1, PI16, ANKS1B, RET, LRRN4CL, RAB39B, KIF5A, SLC22A7, MRGPRE, MOXD1, CTNNA2, PRKCB, TMEM72, CYP4X1, ABCB1A, ABCB1B, ASPHD2, SLC41A2, GIPR, CYBRD1, CLIP3, SUSD3, SERP2, SH3GL2, FAM163A, ENOX1, FUT9, RTP4, MAMDC2, PAQR9, RIMS1, AMPH, DDX3Y, GALNT15,…	177	6998	19662	1.34927	0.10268	0.026722	0.728582
GOTERM_CC_DIRECT	GO:0030672~synaptic vesicle membrane	5	2.57732	0.00217624	SYT1, SYT5, SYT11, SYNGR3, AMPH	177	61	19662	9.10531	0.328798	0.0766409	2.65502
GOTERM_CC_DIRECT	GO:0048786~presynaptic active zone	4	2.06186	0.00239649	NTRK2, DGKI, RIMS1, ADORA1	177	30	19662	14.8113	0.355373	0.070567	2.92008
GOTERM_CC_DIRECT	GO:0043195~terminal bouton	6	3.09278	0.00349956	SYT1, SYT11, NTRK2, GRIA4, ADORA1, AMPH	177	113	19662	5.89831	0.473521	0.0875747	4.23765
GOTERM_CC_DIRECT	GO:0060076~excitatory synapse	4	2.06186	0.00438116	SYT1, SYT11, NTRK2, DGKI	177	37	19662	12.0092	0.552247	0.0955599	5.27883
GOTERM_CC_DIRECT	GO:0043005~neuron projection	11	5.6701	0.0046632	SYT1, ATCAY, FRMD7, RAB39B, SYT5, KIF5A, SYT11, STMN4, KIF5C, SPINK2, SLC4A8	177	420	19662	2.90936	0.574871	0.0906637	5.60973
GOTERM_CC_DIRECT	GO:0043025~neuronal cell body	12	6.18557	0.00880891	PRPH, KCNJ4, RET, FRMD7, SYT5, KIF5A, NTRK2, GRIA4, DGKI, ADORA1, TUBB3, GLRX	177	534	19662	2.49629	0.801937	0.149488	10.3525
GOTERM_CC_DIRECT	GO:0043197~dendritic spine	6	3.09278	0.0107695	ANKS1B, SYT11, NTRK2, FBXO2, DGKI, ADORA1	177	148	19662	4.50344	0.86214	0.164845	12.5183
GOTERM_CC_DIRECT	GO:0005578~proteinaceous extracellular matrix	8	4.12371	0.0239337	MAMDC2, SPOCK3, HPSE, OLFML2B, TFF3, SPOCK1, SLIT1, SPON1	177	316	19662	2.81227	0.988123	0.30887	25.8597
GOTERM_CC_DIRECT	GO:0031526~brush border membrane	4	2.06186	0.0249215	ABCB1A, CYBRD1, NPC1L1, PRKCB	177	70	19662	6.3477	0.990132	0.299012	26.7812
GOTERM_CC_DIRECT	GO:0008021~synaptic vesicle	5	2.57732	0.0267386	SYT1, SYT11, DGKI, SYNGR3, AMPH	177	126	19662	4.40812	0.992985	0.298314	28.4488
GOTERM_CC_DIRECT	GO:0000139~Golgi membrane	9	4.63918	0.0289796	ST6GALNAC5, TMEM59L, FUT9, CLSTN2, ABCB1B, B3GALT1, CHST11, GALNT15, RAB6B	177	403	19662	2.4808	0.9954	0.301468	30.4573
GOTERM_CC_DIRECT	GO:0030425~dendrite	10	5.15464	0.0326363	CPT1C, KCNJ4, ATCAY, RET, NTRK2, GRIA4, GNG3, ADORA1, TUBB3, GLRX	177	490	19662	2.26704	0.997694	0.3158	33.6238
GOTERM_CC_DIRECT	GO:0005576~extracellular region	24	12.3711	0.0406695	PLAT, MAMDC2, SPOCK3, ADAM23, IGFBP7, OLFML2B, SPINK2, SPOCK1, F7, SERPINI1, SLIT1, CXCL10, QPCT, CLEC18A, BMPER, TNFSF11, HPSE, TFF3, PI16, PRSS35, CPB2, SPON1, ENOX1, FGF4	177	1753	19662	1.52084	0.999499	0.360422	40.1201
GOTERM_CC_DIRECT	GO:0016021~integral component of membrane	74	38.1443	0.0425114	SYT1, CLSTN2, SYT5, UTY, SLC45A1, ENPEP, SLC26A10, ADORA1, ST6GALNAC5, SLC2A6, FAM171B, CDKN2A, ELOVL4, CHST11, GXYLT2, NPC1L1, ELOVL7, LRRC55, PI16, RET, LRRN4CL, SLC22A7, MRGPRE, MOXD1, TMEM72, CYP4X1, ABCB1A, KCNT2, ABCB1B, ASPHD2, SLC41A2, GIPR, CYBRD1, SUSD5, SUSD3, SERP2, FAM163A, FUT9, RTP4, 6330403K07RIK, SPOCK1, PAQR9, GALNT15, SLC4A8, FUT2, SLCO3A1, CD6, VSTM2B, CPT1C, TMEM59L, TRPC1, T…	177	6878	19662	1.19515	0.999647	0.357029	41.5248
GOTERM_CC_DIRECT	GO:0045211~postsynaptic membrane	6	3.09278	0.0496502	ANKS1B, KCNJ4, CLSTN2, NTRK2, GRIA4, ADORA1	177	222	19662	3.00229	0.99991	0.387674	46.6876
GOTERM_CC_DIRECT	GO:0030054~cell junction	12	6.18557	0.0584612	CPT1C, SYT1, ANKS1B, KCNJ4, ATCAY, SYT5, SYT11, GRIA4, RIMS1, SYNGR3, AMPH, CTNNA2	177	718	19662	1.85657	0.999984	0.423739	52.4815
GOTERM_CC_DIRECT	GO:0005794~Golgi apparatus	17	8.76289	0.068035	SYT1, TMEM59L, FUT9, RAB39B, CLSTN2, SELM, APC2, B3GALT1, STMN4, ST6GALNAC5, CHST11, GALNT15, RAB6B, FUT2, CLIP3, MAP6, JAKMIP2	177	1190	19662	1.58692	0.999997	0.458823	58.1168
GOTERM_CC_DIRECT	GO:0005874~microtubule	7	3.60825	0.0740895	FSD1, KIF12, APC2, KIF5A, KIF5C, MAP6, TUBB3	177	327	19662	2.37796	0.999999	0.472873	61.3564
GOTERM_CC_DIRECT	GO:0005871~kinesin complex	3	1.54639	0.0790006	KIF12, KIF5A, KIF5C	177	52	19662	6.40874	1	0.480448	63.8132
GOTERM_CC_DIRECT	GO:0005622~intracellular	21	10.8247	0.0800984	EIF2S3Y, RAB39B, ZMAT4, HPCAL4, ZFP874A, EDA2R, RCAN2, RIMS1, GM14418, RDH12, FSD1, STK32B, ZFP941, ZFP287, STAC2, LHX1, DOK5, GM14322, NTRK2, RAB6B, TUBB3	177	1599	19662	1.4589	1	0.470912	64.3424
GOTERM_CC_DIRECT	GO:0005887~integral component of plasma membrane	16	8.24742	0.0805189	TRPC1, RET, TRPC3, SLC22A7, SYT11, EDA2R, MRGPRE, SLC6A15, RHD, SLC26A10, KCNJ4, SLC2A6, NPHS2, NTRK2, SLC4A8, SLCO3A1	177	1126	19662	1.57847	1	0.45908	64.5432
GOTERM_CC_DIRECT	GO:0035253~ciliary rootlet	2	1.03093	0.0860108	KIF5A, KIF5C	177	10	19662	22.2169	1	0.469011	67.0721
GOTERM_CC_DIRECT	GO:0046581~intercellular canaliculus	2	1.03093	0.0860108	ABCB1A, ABCB1B	177	10	19662	22.2169	1	0.469011	67.0721
GOTERM_CC_DIRECT	GO:0045121~membrane raft	6	3.09278	0.0870211	TRPC1, RET, HPSE, NPHS2, CLIP3, CYS1	177	262	19662	2.54393	1	0.460475	67.5188
Downregulated genes
Category	Term	Count	%	PValue	Genes	List Total	Pop Hits	Pop Total	Fold Enrichment	Bonferroni	Benjamini	FDR
GOTERM_CC_DIRECT	GO:0009897~external side of plasma membrane	6	9.52381	0.00205777	FGG, FGA, CD59A, IL2RG, CEACAM2, FCGR3	57	317	19662	6.52897	0.141383	0.141383	2.13295
GOTERM_CC_DIRECT	GO:0005615~extracellular space	12	19.0476	0.00305688	APOA4, AFP, FGG, FGA, SERPINB6B, CFB, CES2B, SELENBP1, CFI, LIPC, MUC13, PROC	57	1504	19662	2.75224	0.202725	0.107097	3.15365
GOTERM_CC_DIRECT	GO:0072562~blood microparticle	4	6.34921	0.00645839	APOA4, FGG, FGA, CFB	57	133	19662	10.3744	0.380889	0.147706	6.55687
GOTERM_CC_DIRECT	GO:0005829~cytosol	12	19.0476	0.0108765	APOA4, VDR, ALOX15, MLXIPL, TGM2, SELENBP1, PDX1, FBP2, UROC1, MUC13, CIDEC, PCK1	57	1784	19662	2.32027	0.554818	0.183165	10.8157
GOTERM_CC_DIRECT	GO:0005577~fibrinogen complex	2	3.1746	0.0197704	FGG, FGA	57	7	19662	98.5564	0.77183	0.255865	18.8607
GOTERM_CC_DIRECT	GO:0005576~extracellular region	11	17.4603	0.0249163	APOA4, AFP, FGG, FGA, CFB, CD59A, CFI, LIPC, MUC13, SPP2, PROC	57	1753	19662	2.16453	0.845439	0.267429	23.21
GOTERM_CC_DIRECT	GO:0009986~cell surface	6	9.52381	0.0330217	APOA4, FGG, FGA, TIMD2, LIPC, CEACAM2	57	629	19662	3.29044	0.916663	0.298813	29.6342
GOTERM_CC_DIRECT	GO:0070062~extracellular exosome	14	22.2222	0.0348599	APOA4, FGG, FGA, CFB, TGM2, SELENBP1, TSPAN8, FBP2, CFI, CEACAM2, SPP2, MUC13, PCK1, FCGR3	57	2674	19662	1.80601	0.927609	0.279787	31.0218
GOTERM_CC_DIRECT	GO:0031091~platelet alpha granule	2	3.1746	0.0418953	FGG, FGA	57	15	19662	45.993	0.957873	0.296647	36.1067
GOTERM_CC_DIRECT	GO:0005922~connexon complex	2	3.1746	0.0554735	GJB1, GJB2	57	20	19662	34.4947	0.98535	0.344482	44.9732
GOTERM_CC_DIRECT	GO:0034364~high-density lipoprotein particle	2	3.1746	0.0581664	APOA4, LIPC	57	21	19662	32.8521	0.98814	0.331783	46.5933
GOTERM_CC_DIRECT	GO:0005783~endoplasmic reticulum	8	12.6984	0.0804675	TMED6, SEC16B, AIFM3, TGM2, BC016579, GJB1, PROC, CIDEC	57	1323	19662	2.08585	0.997986	0.403885	58.4407
GOTERM_CC_DIRECT	GO:0005921~gap junction	2	3.1746	0.0898986	GJB1, GJB2	57	33	19662	20.9059	0.999061	0.41504	62.6917
