# Supplementary material for: The transcription factor Rreb1 regulates epithelial architecture, invasiveness, and vasculogenesis in early mouse embryos
Source: eLife. 2021 Apr 30;10:e64811. doi: 10.7554/eLife.64811 (PMC8131102; doi:10.7554/eLife.64811)
Supplement: Figure 3—source data 3. — KEGG pathway analysis was performed using the Database for Annotation, Visualization, and Integrated Discovery (DAVID) Bioinformatics tool. [file elife-64811-fig3-data3.xlsx]

## Sheet: Sheet1
S3 Table. KEGG pathway analysis of genes significantly upregulated and downregulated in E7.5 Rreb1 mutant embryos.
Upregulated genes
Category	Term	Count	%	PValue	Genes	List Total	Pop Hits	Pop Total	Fold Enrichment	Bonferroni	Benjamini	FDR
KEGG_PATHWAY	mmu04728:Dopaminergic synapse	6	3.09278	0.00686475	GNG3, PPP2R2C, KIF5C, PRKCB, KIF5A, GRIA4	70	134	7691	4.91962	0.634215	1	1
KEGG_PATHWAY	mmu00601:Glycosphingolipid biosynthesis - lacto and neolacto series	3	1.54639	0.0224417	FUT9, B3GALT1, FUT2	70	26	7691	12.6775	0.963623	1	1
KEGG_PATHWAY	mmu04976:Bile secretion	4	2.06186	0.0255959	NR1H4, ABCB1A, SLC22A7, ABCB1B	70	71	7691	6.18994	0.977306	1	1
KEGG_PATHWAY	mmu04726:Serotonergic synapse	5	2.57732	0.0304107	GNG3, CYP4X1, CYP2C44, PRKCB, TRPC1	70	132	7691	4.1618	0.988989	1	1
KEGG_PATHWAY	mmu02010:ABC transporters	3	1.54639	0.0637701	ABCB1A, ABCG4, ABCB1B	70	46	7691	7.16553	0.999934	1	1
KEGG_PATHWAY	mmu04723:Retrograde endocannabinoid signaling	4	2.06186	0.0648164	RIMS1, GNG3, PRKCB, GRIA4	70	103	7691	4.26685	0.999944	1	1
KEGG_PATHWAY	mmu04725:Cholinergic synapse	4	2.06186	0.0806465	KCNJ4, GNG3, PRKCB, CAMK4	70	113	7691	3.88925	0.999995	1	1
KEGG_PATHWAY	mmu04724:Glutamatergic synapse	4	2.06186	0.0839981	GNG3, PRKCB, TRPC1, GRIA4	70	115	7691	3.82161	0.999997	1	1
Downregulated genes
Category	Term	Count	%	PValue	Genes	List Total	Pop Hits	Pop Total	Fold Enrichment	Bonferroni	Benjamini	FDR
KEGG_PATHWAY	mmu04610:Complement and coagulation cascades	6	9.52381	8.13998e-06	FGA, PROC, CD59A, FGG, CFI, CFB	30	76	7691	20.2395	0.000488281	0.000488399	0.000488399
KEGG_PATHWAY	mmu05150:Staphylococcus aureus infection	4	6.34921	0.000838763	FCGR3, FGG, CFI, CFB	30	50	7691	20.5093	0.0491005	0.0251629	0.0251629
KEGG_PATHWAY	mmu04977:Vitamin digestion and absorption	2	3.1746	0.0798557	SLC52A3, APOA4	30	22	7691	23.3061	0.993218	1	1
